# Supplementary material for: Voluntary Physical Exercise Reduces Motor Dysfunction and Hampers Tumor Cell Proliferation in a Mouse Model of Glioma
Source: MDPI journal article supplement (doi:10.3390/ijerph17165667), 2020-08-05
Supplement: s1 [file s1]

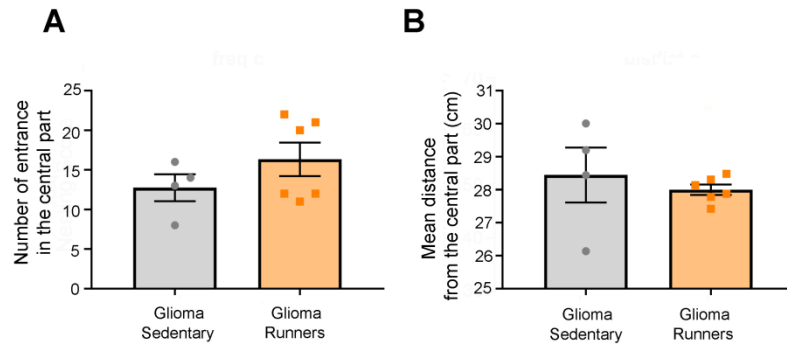

**Figure S1.** (A) Number of entrance in the central part. (B). Mean distance from the central part. Running glioma-bearing mice displayed the same anxiety level of sedentary glioma-bearing animals. Runner glioma mice ( $n = 6$ ) didn't show any differences in the number of entrance and in the mean distance travelled from the central part of the arena with respect to the sedentary group ( $n = 4$ ;  $t$ -test,  $p = 0.537$  and  $p = 0.26$ ). Data are expressed as mean  $\pm$  SEM.

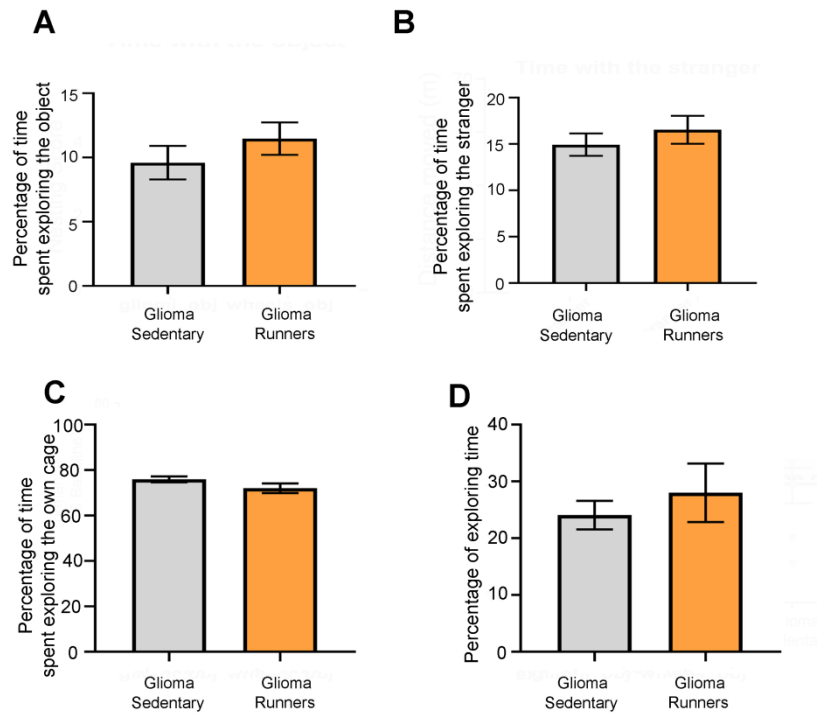

**Figure S2:** Sociability of running and sedentary glioma-bearing mice. Runner glioma mice ( $n = 6$ ) didn't show any differences in the four parameters considered to evaluate the three chambers sociability test with respect to the sedentary group ( $n = 4$ ). (A):  $t$ -test,  $p = 0.39$ ; (B):  $t$ -test,  $p = 0.517$ ; (C):  $t$ -test,  $p = 0.16$ ; (D):  $t$ -test,  $p = 0.12$ ). Data are expressed as mean  $\pm$  SEM.
